# Supplementary material
Source: Springer Nature journal article supplement (https://www.springermedizin.de/resource/supplementary/13045_2009_44_MOESM1_ESM.pdf/9660540)

pH4

pH7

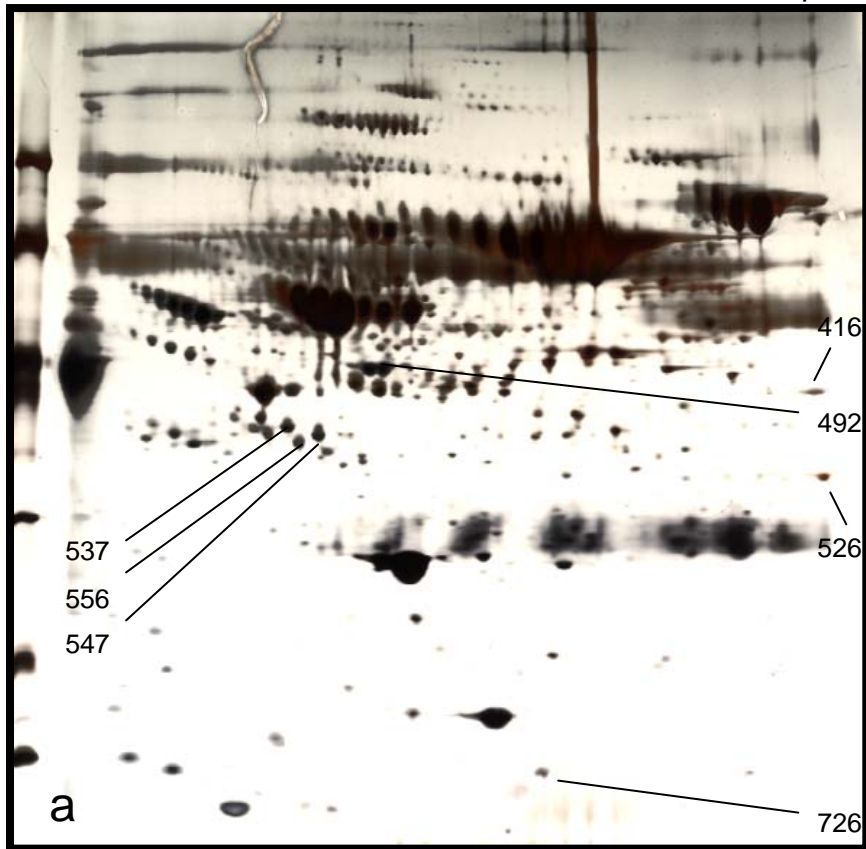

pH4

pH7

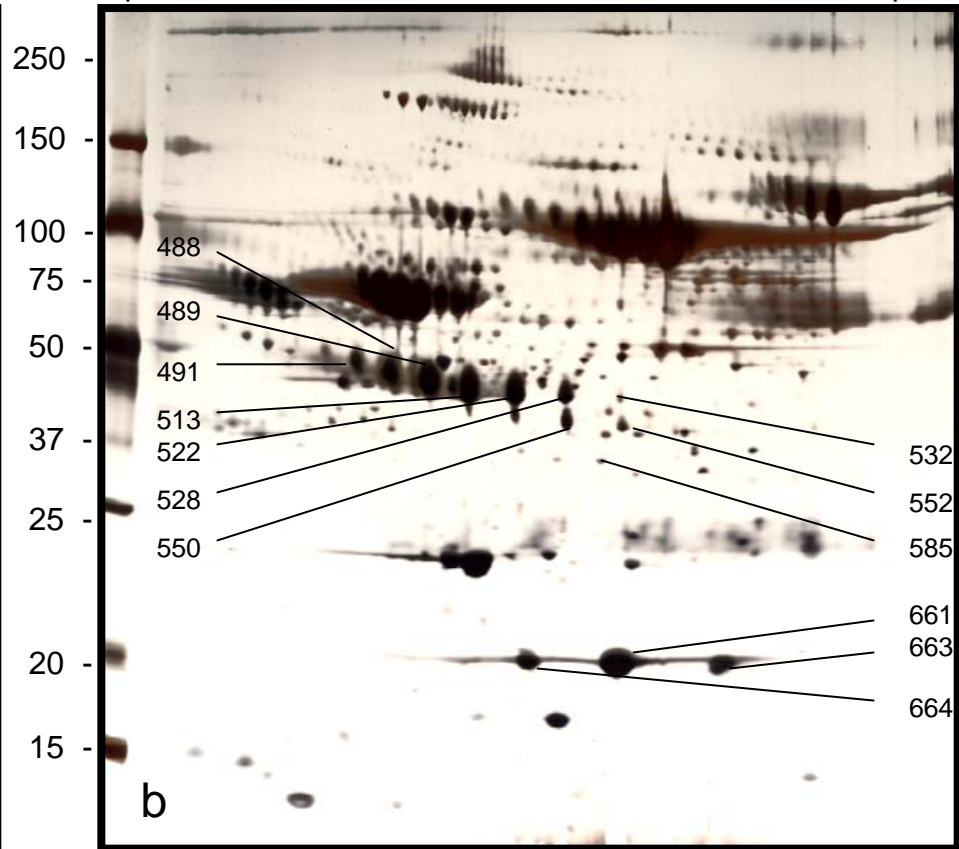

Supplement: MOESM1 [file 9660540]
